# Supplementary material for: Genome-Wide Identification and Analysis of the Maize Serine Peptidase S8 Family Genes in Response to Drought at Seedling Stage
Source: MDPI journal article supplement (doi:10.3390/plants12020369), 2023-01-12
Supplement: s1 [file s1]

**Table S1.** Primer sequences for qRT-PCR analysis

| Gene name          | Primer sequences          |                            |
|--------------------|---------------------------|----------------------------|
| <i>ZmPP2C-A10</i>  | F: GTTTCAGCCTGACAGGAAGG   | R: ACCCTATAGCCGTTCCATTG    |
| <i>ZmSPS8.1.4</i>  | F: CGACATCAGCGTTAGAGTCAAG | R: CATCCCCCAAGTGACGATATC   |
| <i>ZmSPS8.1.6</i>  | F: GCAAACCTGGTCCTCGGCAAC  | R: GGCTCACACGAGCCGTT       |
| <i>ZmSPS8.1.7</i>  | F: CACTGGTATCTTGAAGCCGGA  | R: GTTAGGATTGTCCGAGGGCG    |
| <i>ZmSPS8.1.8</i>  | F: ATCCAAGGAGTACTTACCATGC | R: AAAGAGCCAAAAACGTAACCTC  |
| <i>ZmSPS8.1.9</i>  | F: ACATGGTGGATGCAAGCTCT   | R: TGGACCTCTTGAGGAAAAGC    |
| <i>ZmSPS8.1.10</i> | F: TCCGTTCTTGGGAGGTAGCA   | R: GCTCACGACTCCAGGGTATT    |
| <i>ZmSPS8.1.12</i> | F: GGATCTTGCAATAGAAAGCTCG | R: CTTGCATTTCCAAATTGATGCC  |
| <i>ZmSPS8.1.13</i> | F: CAACCAGAGCGAAGTATCAAAC | R: CTTGTCATGATGGTGTAGGTCT  |
| <i>ZmSPS8.1.14</i> | F: CCGGTAACCTGTTACTCGG    | R: CGAAGAGACGACGTAGGAC     |
| <i>ZmSPS8.2.0</i>  | F: CTCCTTCTGCTGCTTCGACA   | R: GACCAAGTACCTCCACTGGG    |
| <i>ZmSPS8.3.1</i>  | F: CTTTGTCAAGTTGATAGGGCTT | R: GTAGTAGAGATAGGGCGCAATT  |
| <i>ZmSPS8.3.2</i>  | F: TGTTGTACAACCATCTGCAAAG | R: AGAAGGAGATGACATGGAAGTGC |
| <i>ZmSPS8.3.3</i>  | F: AGGCACATGAAGACATGCAA   | R: TGTTACCCTCAAGGGTCTGG    |
