# Supplementary material for: Genome-Wide Identification and Analysis of the Maize Serine Peptidase S8 Family Genes in Response to Drought at Seedling Stage
Source: MDPI journal article supplement (doi:10.3390/plants12020369), 2023-01-12
Supplement: s1 [file s1]

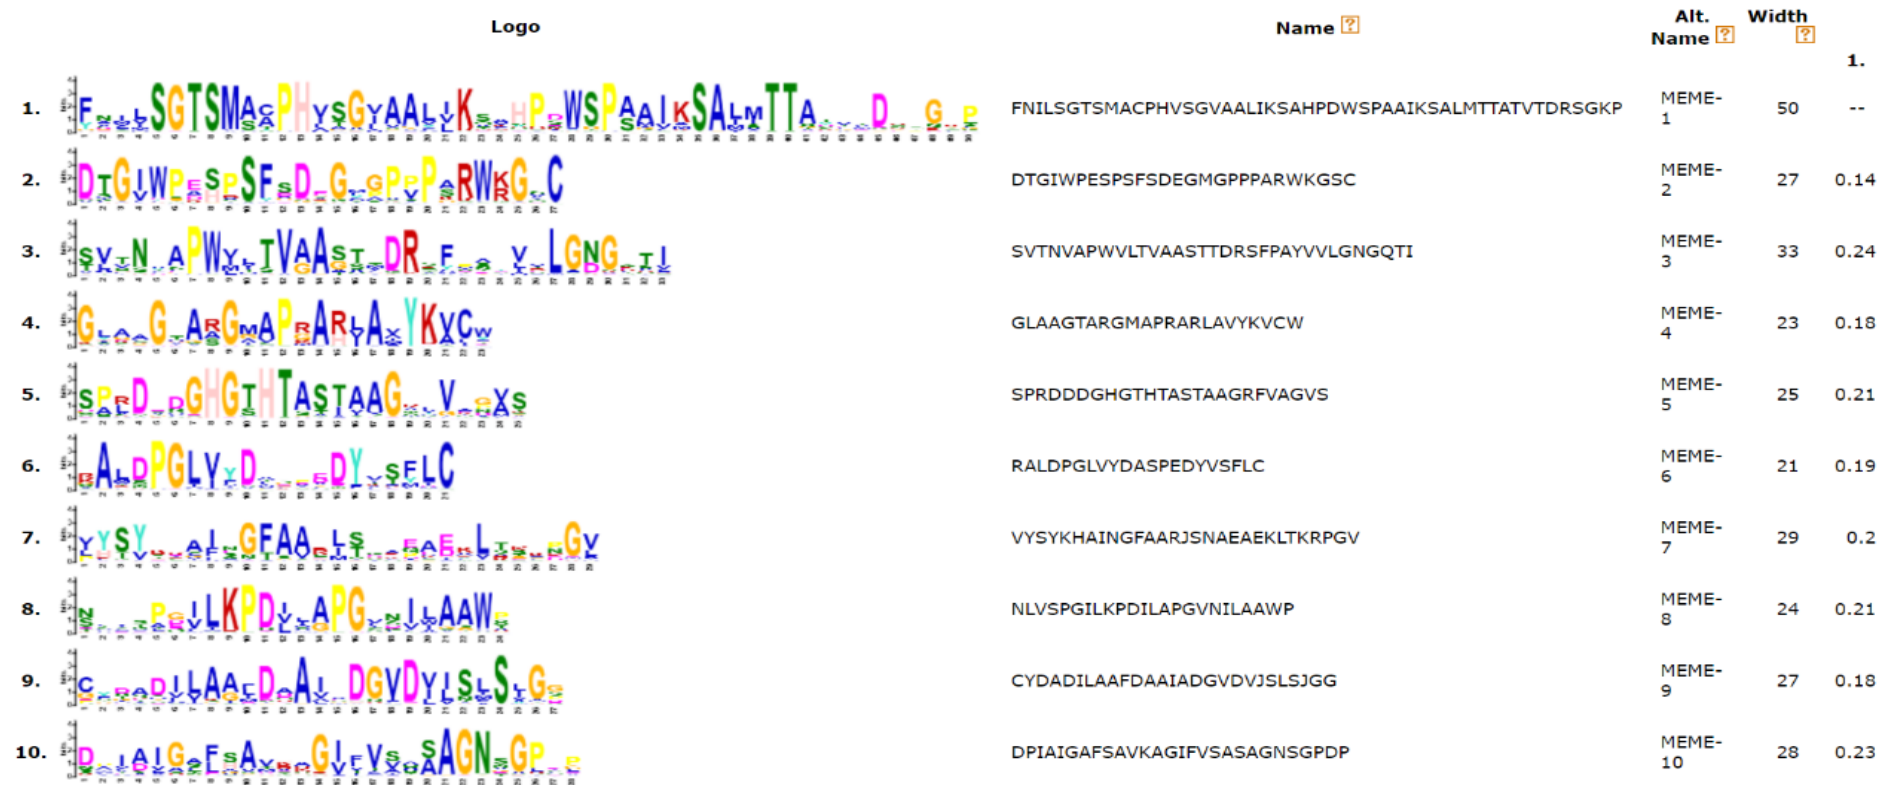

Figure S1. Schematic of ZmSPS8 conserved motifs. Ten conserved motifs were identified using MEME.

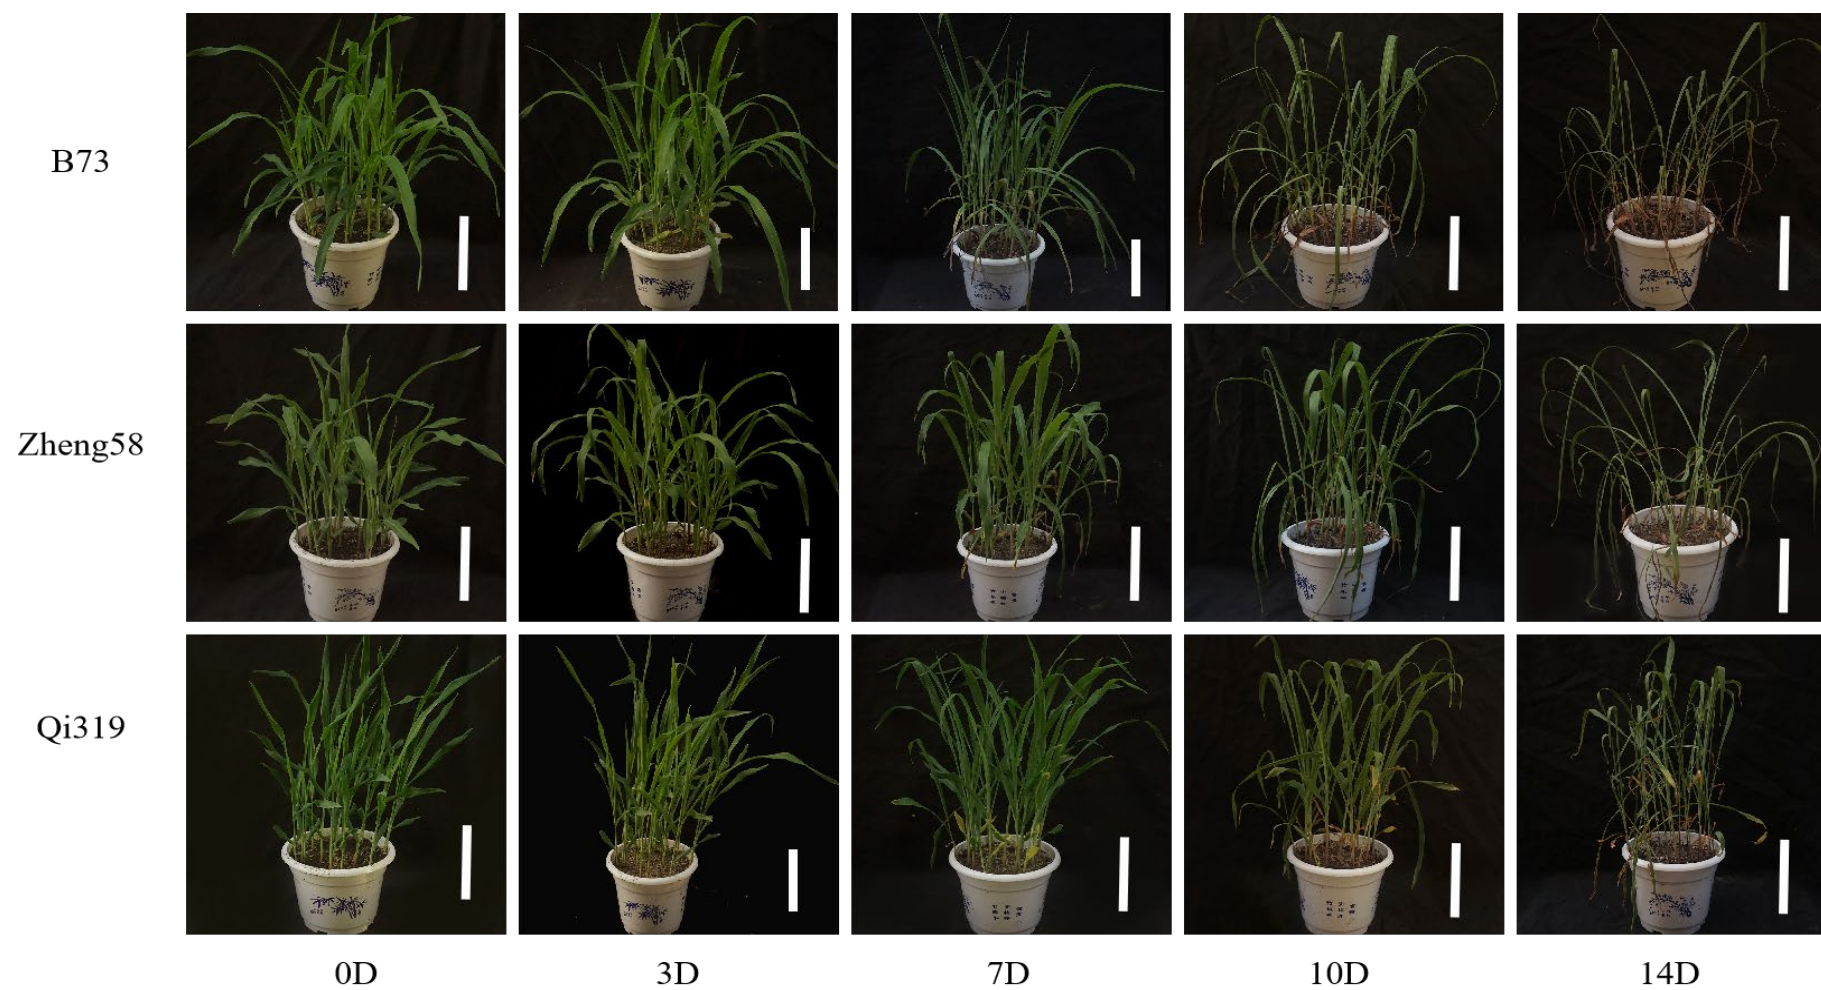

**Figure S2.** The morphological changes of three maize lines with increasing drought treatment time.
